# Supplementary material for: Analysing the stability of He-filled hydrates: how many He atoms fit in the sII crystal?
Source: Royal Society of Chemistry journal article supplement (doi:10.1039/d3cp05410a), 2023-12-01
Supplement: d3cp05410a1.pdf [file d3cp05410a1.pdf]

# **Analysing the stability of He-filled hydrates: how many He atoms fit in the sII crystal?**

Raquel Yanes-Rodríguez<sup>1,a</sup> and Rita Prosimi<sup>1\*</sup>

<sup>1</sup>*Institute of Fundamental Physics (IFF-CSIC), CSIC, Serrano 123, 28006 Madrid, Spain*

E-mail: \*rita@iff.csic.es; Phone: +34-91-5616800Ext.442292

---

<sup>a</sup>Doctoral Programme in Theoretical Chemistry and Computational Modelling, Doctoral School, Universidad Autónoma de Madrid

## Supplementary material

Table S1: MEOS fitting results obtained from semi-local (PW86PBE, PW86PBE-XDM, PW86PBE-D4) and non-local functionals (vdW-DF and vdW-DF2) considering empty, single and multiple-cage occupancy of the small and large cages of the sII periodic crystal.

| System                   | Functional  | $a_0$ (Å) | $B_0$ (GPa) | $B'_0$ | $V_0$ (Å <sup>3</sup> ) |
|--------------------------|-------------|-----------|-------------|--------|-------------------------|
| sII                      | PW86PBE     | 17.016    | 13.98       | 11.04  | 4926.50                 |
|                          | PW86PBE-XDM | 16.912    | 15.59       | 8.35   | 4837.23                 |
|                          | PW86PBE-D4  | 16.943    | 15.29       | 9.33   | 4863.68                 |
|                          | vdW-DF      | 17.480    | 8.96        | 4.17   | 5341.38                 |
|                          | vdW-DF2     | 17.358    | 10.84       | 4.68   | 5229.71                 |
| He <sub>(1/1)</sub> @sII | PW86PBE     | 17.040    | 13.05       | 8.87   | 4947.66                 |
|                          | PW86PBE-XDM | 16.903    | 15.85       | 8.38   | 4829.74                 |
|                          | PW86PBE-D4  | 16.950    | 15.08       | 8.86   | 4869.97                 |
|                          | vdW-DF      | 17.432    | 9.15        | 4.30   | 5297.35                 |
|                          | vdW-DF2     | 17.329    | 10.92       | 4.81   | 5203.41                 |
| He <sub>(1/4)</sub> @sII | PW86PBE     | 17.064    | 13.26       | 9.46   | 4968.65                 |
|                          | PW86PBE-XDM | 16.888    | 16.14       | 12.33  | 4816.75                 |
|                          | PW86PBE-D4  | 16.960    | 15.06       | 10.01  | 4878.18                 |
|                          | vdW-DF      | 17.424    | 9.62        | 4.44   | 5289.56                 |
|                          | vdW-DF2     | 17.315    | 11.25       | 4.86   | 5191.24                 |
| He <sub>(2/4)</sub> @sII | PW86PBE     | 17.121    | 12.61       | 9.14   | 5018.19                 |
|                          | PW86PBE-XDM | 16.937    | 15.26       | 11.66  | 4858.81                 |
|                          | PW86PBE-D4  | 17.005    | 14.47       | 9.76   | 4917.44                 |
|                          | vdW-DF      | 17.481    | 9.76        | 4.76   | 5341.55                 |
|                          | vdW-DF2     | 17.350    | 11.45       | 4.83   | 5222.26                 |
